# Supplementary material for: A high‐affinity, bivalent PDZ domain inhibitor complexes PICK1 to alleviate neuropathic pain
Source: PubMed Central journal article supplement (PMC7278562; doi:10.15252/emmm.201911248), 2020-04-30
Supplement: EMMM-12-e11248-s001.pdf [file EMMM-12-e11248-s001.pdf]

# **A high-affinity PDZ domain inhibitor bivalently complexes PICK1 to alleviate neuropathic pain**

## **Appendix Materials**

Christensen\*, De Luca\* et al.

### **This appendix includes**

Appendix Figures S1 to 14

Appendix Tables S1 to 3

## Appendix figures and legends

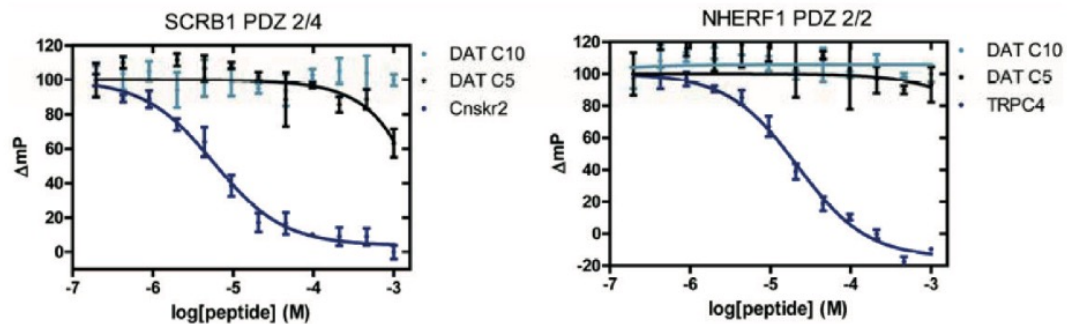

### Appendix Figure S1 Fluorescence polarization competition curves for binding of DAT C5 and DAT C10 to SCR1 PDZ2/4 and NHERF1 PDZ 2/2

SCR1 PDZ2/4 (left) and NHERF1 PDZ 2/2 (right) were incubated with fluorescently labelled peptide corresponding to the C-terminus of Cnskr2 and TRPC4, respectively, and competition binding curves constructed by addition of increasing concentration of the non-labelled peptides as indicated by the legends. Whereas Cnskr2 and TRPC4 both bound to their respective PDZ domains, the DAT C-terminal peptides did not bind to either of the domains indicating that the low values observed in the screen most likely represented false positives.

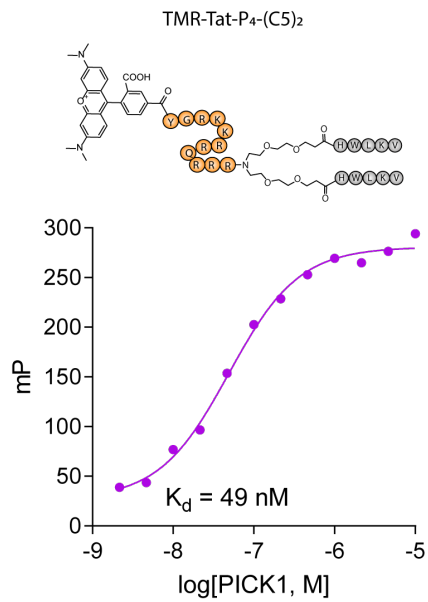

**Appendix Figure S2. FP binding curves in competition with TMR-Tat-P<sub>4</sub>-(C5)<sub>2</sub> as tracer.**

Primary sequence of TMR-Tat-P<sub>4</sub>-(C5)<sub>2</sub> and FP saturation binding curve after titration with increasing concentration of PICK1. Data are shown as mean with error-bars as SEM of n = 3. Binding curves were fitted to a log dose-response (three parameters) extracting the K<sub>d</sub> GraphPad Prism 8.3.

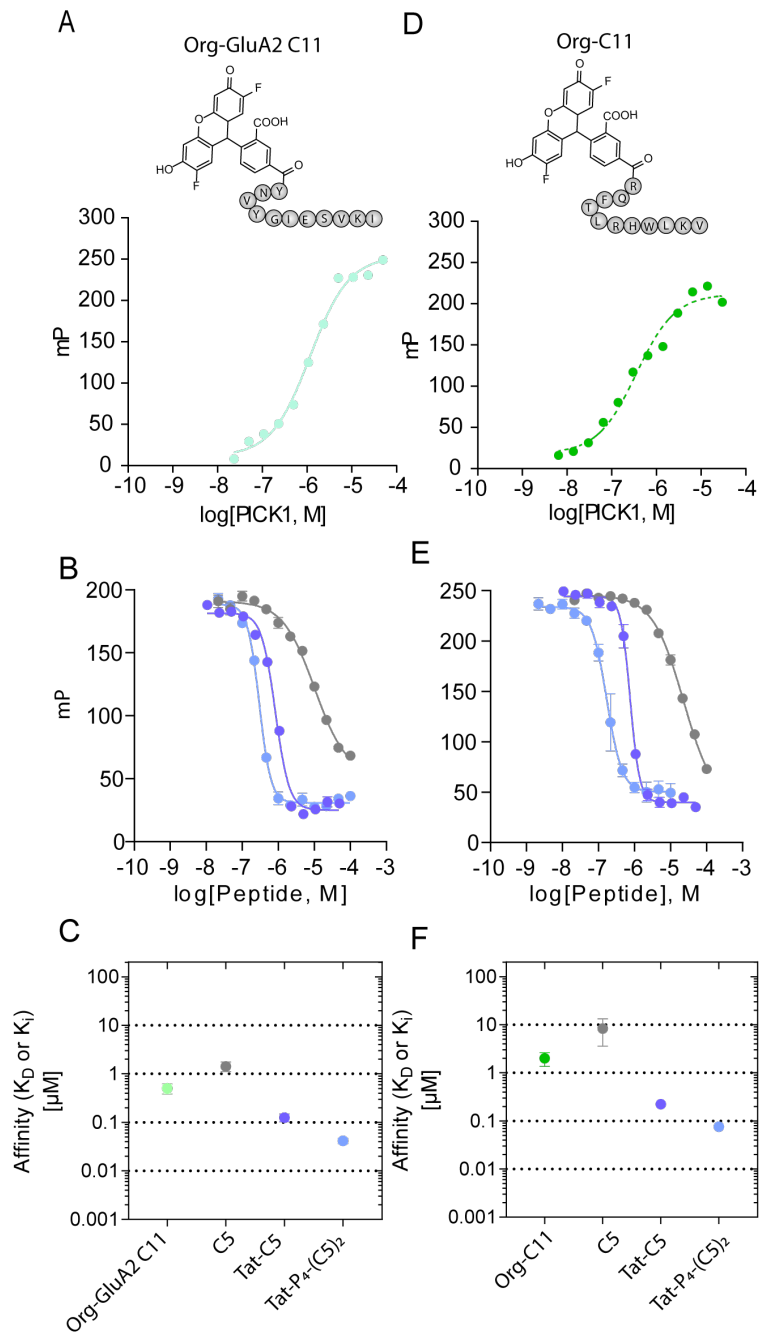

**Appendix Figure S3. FP binding curves in competition with different tracers.**

A. Primary sequence of Org-GluA2 C11 and FP saturation binding curve after titration with increasing concentration of PICK1.

- B. FP competition binding of C5 (*grey*), Tat-C5 (*purple*) or Tat-P<sub>4</sub>-(C5)<sub>2</sub> (*blue*), to PICK1 with Org-GluA2 C11 (20 nM) as tracer.
- C. Summary of affinities derived from fits.
- D. Primary sequence of Org-C11 and representative FP saturation binding curve after titration with increasing concentration of PICK1.
- E. FP competition binding of C5 (*grey*), Tat-C5 (*purple*) or Tat-P<sub>4</sub>-(C5)<sub>2</sub> (*blue*), to PICK1 with Org-C11 (20 nM) as tracer.
- F. Summary of affinities derived from fits.

Data information: Data are shown as mean with error-bars as SEM of n = 6. Binding curves were fitted to a log dose-response (three parameters) extracting the  $K_d$  or  $IC_{50}$  using GraphPad Prism 8.3.

$K_i$  was calculated using the Cheng-Prusoff equation.

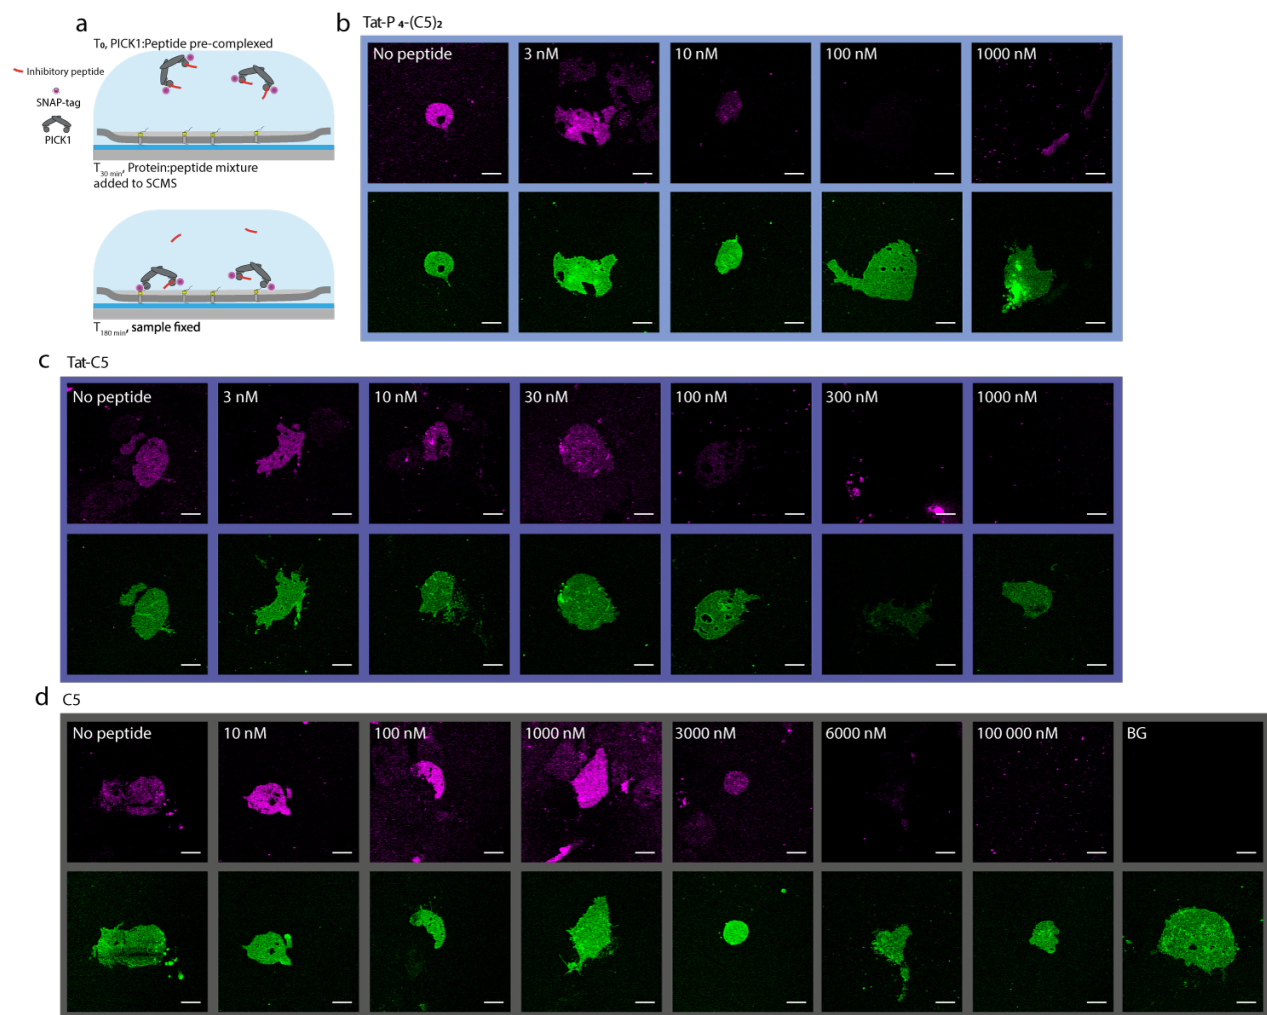

**Appendix Figure S4 Competition of PICK1 binding to SCMSs with pre-incubation of inhibitory peptides.**

A. Illustration of experimental approach. Fluorescently labeled PICK1 was incubated with inhibitor peptide before interaction with the Supported Cell Membrane Sheets (SCMS) expressing TAC-YFP-DAT C24.

B-D. Representative fluorescence confocal microscopy images of SCMS expressing TAC-YFP-DAT C24 (green), incubated with fluorescently labeled PICK1 (magenta) pre-complexed

with increasing concentration of peptides prior to binding to SCMSs. Visible reduction in binding of PICK1 (magenta) is observed at 10 nM, 100 nM and 3000 nM of Tat-P4-(C5)<sub>2</sub>, Tat-C5 and C5, respectively. For curves in Figure 1C images were pooled from three independent experiments. Note that images for 10 nM are also shown in Fig 2B.

Data information: In all images scale-bars represents 10  $\mu\text{m}$ .

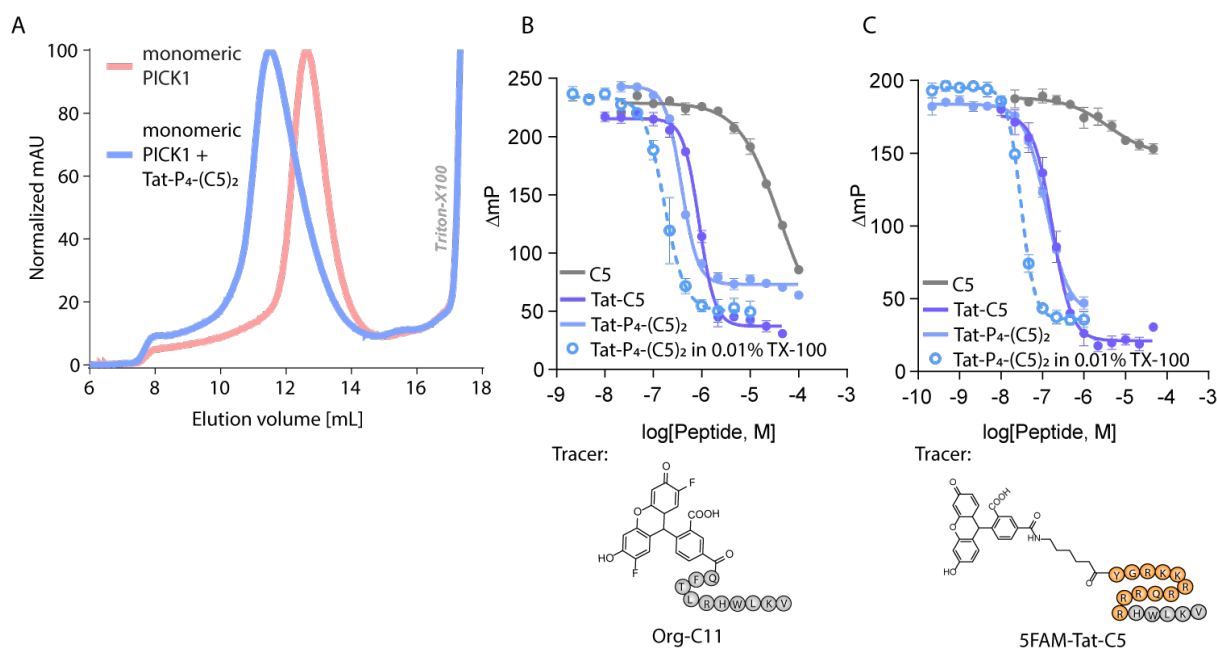

### Appendix Figure S5. Tat-P<sub>4</sub>-(C5)<sub>2</sub> induces a pseudo-dimeric structure of monomeric PICK1.

- FPLC trace of PICK1 run under monomeric conditions in absence (pink) or presence (blue) of Tat-P<sub>4</sub>-(C5)<sub>2</sub>.
- FP competition binding of C5, Tat-C5 or Tat-P<sub>4</sub>-(C5)<sub>2</sub>, to monomeric PICK1 with 5FAM-Tat-C5 (20 nM) as tracer. Dashed curve is Tat-P<sub>4</sub>-(C5)<sub>2</sub> binding to dimeric PICK1
- FP competition binding of C5, Tat-C5 or Tat-P<sub>4</sub>-(C5)<sub>2</sub>, to monomeric PICK1 with Org-C11 (20 nM) as tracer.

Data information: Data points are shown as mean with error-bars as SEM of  $n \geq 3$  replicates. Experiments were repeated for separate purification of PICK1. PICK1 run in a buffer containing 0.1% TX-100 is primarily monomeric, while it's primarily dimeric in a buffer containing 0.01% TX-100.

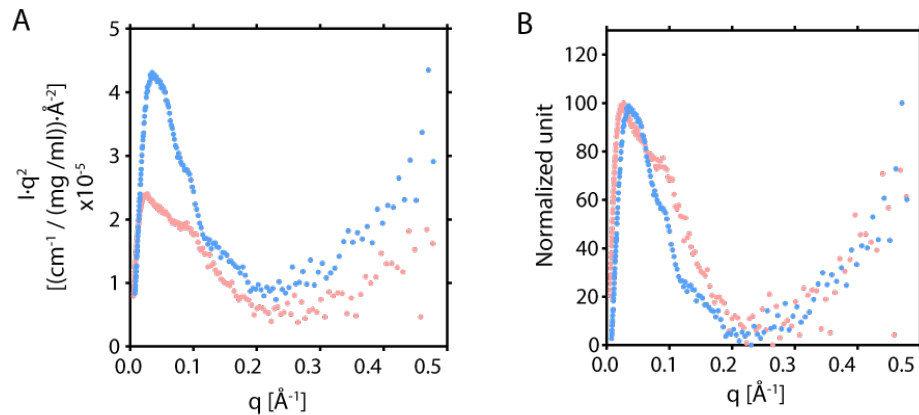

**Appendix Figure S6. Kratky plot of SAXS data for PICK1 with and without Tat-P<sub>4</sub>-(C5)<sub>2</sub>.**

- A. Kratky plot ( $Iq^2/q$ ) of tetrameric PICK1 complexed with Tat-P<sub>4</sub>-(C5)<sub>2</sub> (blue) and PICK1 in absence of inhibitor (pink) on absolute scale
- B. Kratky plot ( $Iq^2/q$ ) of tetrameric PICK1 complexed with Tat-P<sub>4</sub>-(C5)<sub>2</sub> (blue) and PICK1 in absence of inhibitor (pink) normalized to top and bottom (set to 0 and 100, respectively) of the blue curve to facilitate comparison of the shape of the curves.

Data information: The plots show that incubation of PICK with Tat-P<sub>4</sub>-(C5)<sub>2</sub> (blue) confine the signal slightly more at low  $q$  than seen for PICK1 alone (pink) indicating that the peptide reduces inter-domain flexibility.



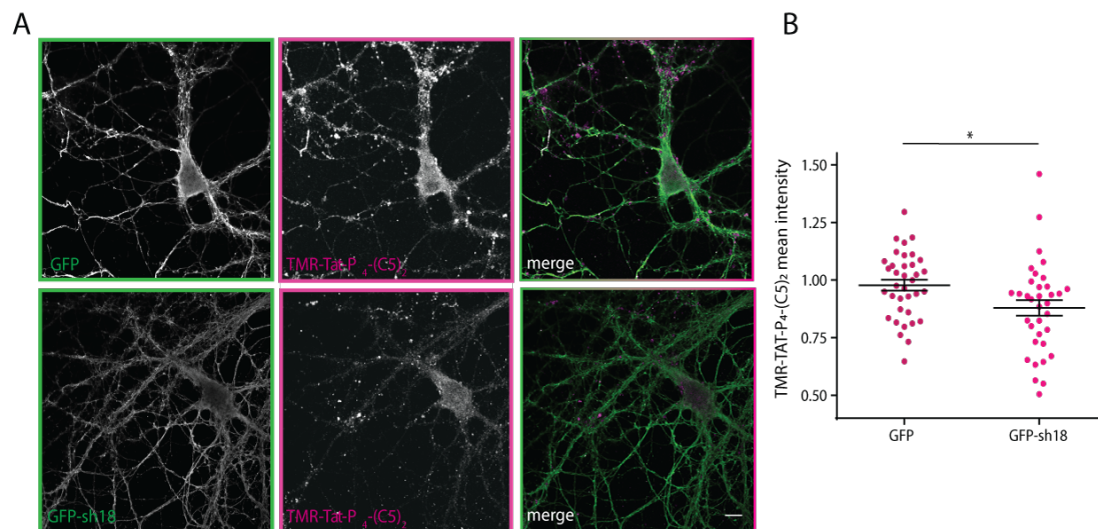

**Appendix Figure S7. PICK1 knock down reduces TMR-Tat-P<sub>4</sub>-(C5)<sub>2</sub> accumulation in hippocampal neurons.**

A. Representative confocal images of hippocampal neurons transduced with the viral vector encoding GFP (top) or with the GFP co-expressed with the short hairpin 18 silencing PICK1 (GFP-sh18, middle). Images show: GFP, GFP-sh18 in green, 5 nM of TMR-Tat-P<sub>4</sub>-(C5)<sub>2</sub> in magenta, as well as the two images merged.

B. Quantification of TMR-Tat-P<sub>4</sub>-(C5)<sub>2</sub> intensity values of each transduced neuron from A. normalized to the TMR-Tat-P<sub>4</sub>-(C5)<sub>2</sub> intensity mean of the GFP construct.

Data information: Scale bar: 10 μm. Each dot represents a single neuron, Unpaired t-test,  $t_{(69)}=2,390$ ,  $*P<0.05$ , GFP n = 36 and GFP-sh18 n = 35. Horizontal bars show mean with error-bars as SEM.

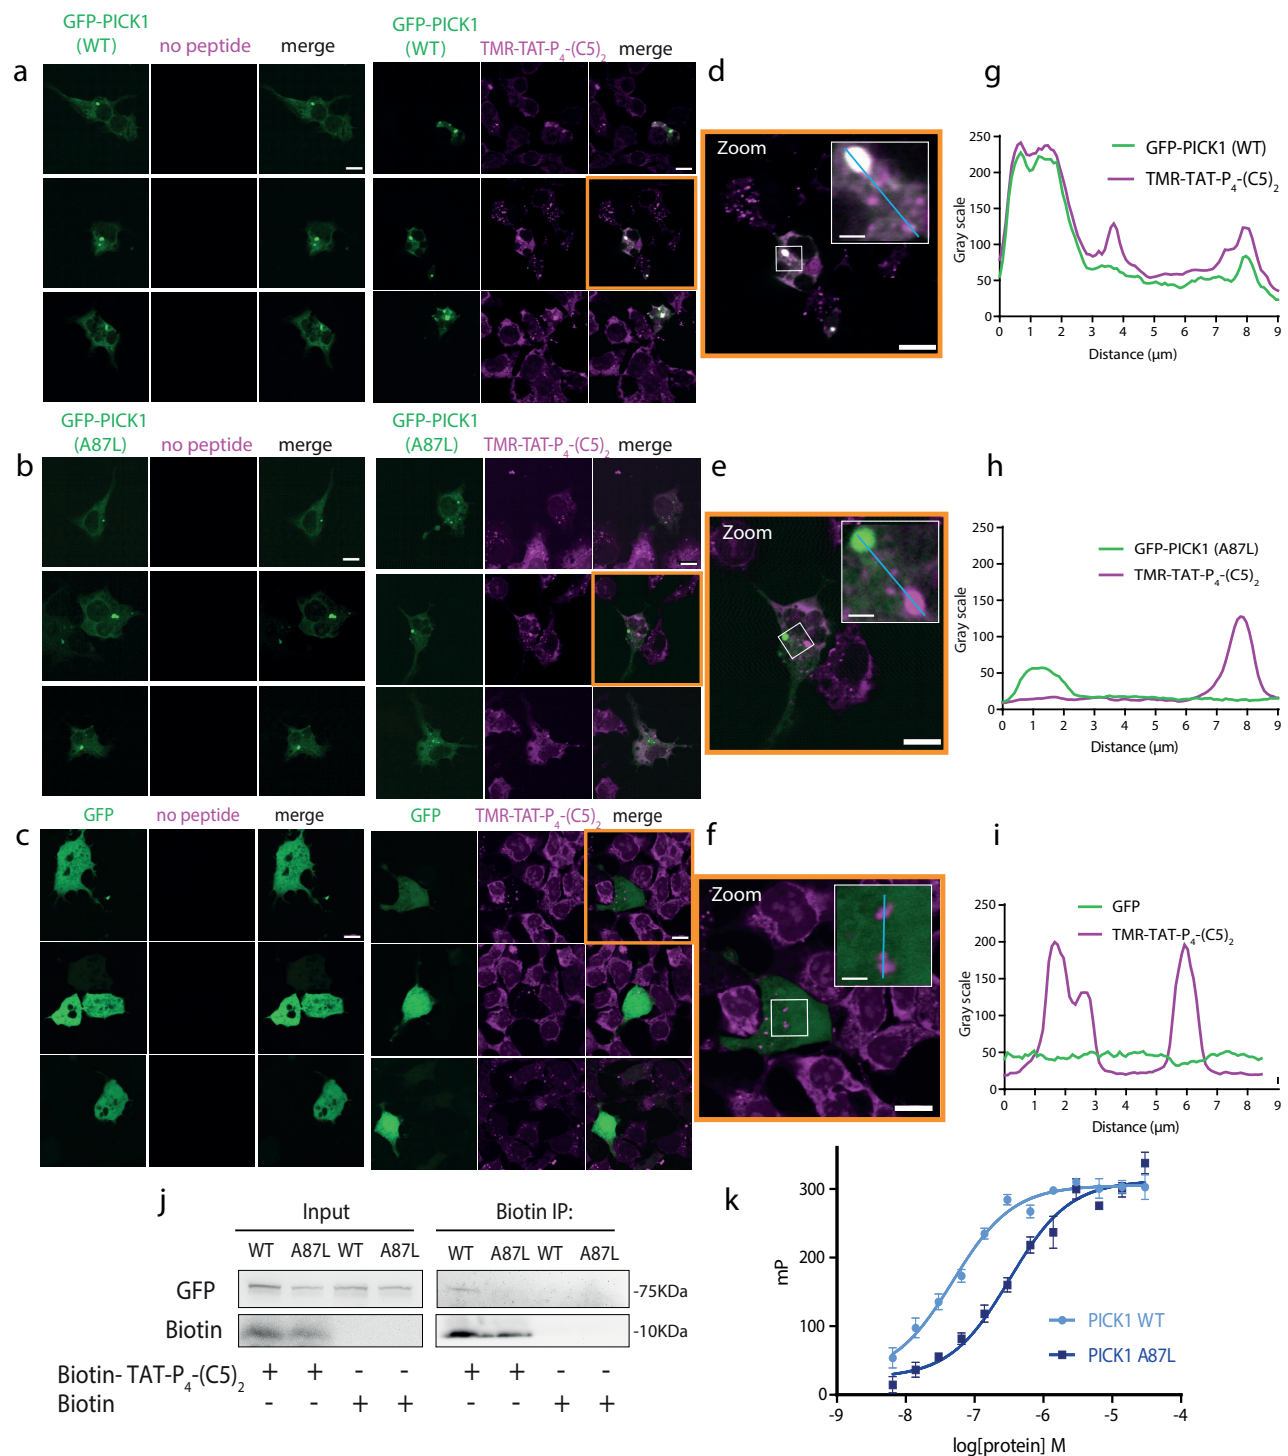

**Appendix Figure S8. PDZ-dependent interaction between PICK1 and TMR-Tat-P<sub>4</sub>-(C5)<sub>2</sub> in heterologous cell.**

- A. Representative confocal images of HEK 293 cells overexpressing GFP-PICK1 WT in absence (*left*) or presence (*right*) of TMR-Tat-P<sub>4</sub>-(C5)<sub>2</sub>.
- B. Representative confocal images of HEK 293 cells overexpressing GFP-PICK1 A87L (PDZ mutant) in absence (*left*) or presence (*right*) of TMR-Tat-P<sub>4</sub>-(C5)<sub>2</sub>.
- C. Representative confocal images of HEK 293 cells overexpressing soluble GFP in absence (*left*) or presence (*right*) of TMR-Tat-P<sub>4</sub>-(C5)<sub>2</sub>.
- D. Zoom in of merged image highlighted in A. where white indicates colocalization of GFP-PICK1 WT (*green*) and TMR-Tat-P<sub>4</sub>-(C5)<sub>2</sub> (*magenta*).
- E. Zoom in of merged image highlighted in B. Showing no indication of colocalization for GFP-PICK1 A87L (*green*) and TMR-Tat-P<sub>4</sub>-(C5)<sub>2</sub> (*magenta*).
- F. Zoom in of merged image highlighted in B. Showing no indication of colocalization for soluble GFP (*green*) and TMR-Tat-P<sub>4</sub>-(C5)<sub>2</sub> (*magenta*).
- G. Intensity profiles of the line (light blue) from insert zoom D. showing clear colocalization for GFP-PICK1 WT (*green*) and TMR-Tat-P<sub>4</sub>-(C5)<sub>2</sub> (*magenta*).
- H. Intensity profiles of the line (light blue) from insert zoom E. showing no clear colocalization for GFP-PICK1 A87L (*green*) and TMR-Tat-P<sub>4</sub>-(C5)<sub>2</sub> (*magenta*).
- I. Intensity profiles of the line (light blue) from insert zoom F. showing clear colocalization for soluble GFP (*green*) and TMR-Tat-P<sub>4</sub>-(C5)<sub>2</sub> (*magenta*).
- J. Representative immunoblots of pull-down experiment in HEK 293 cells of PICK1 WT or A87L mutant with Biotin-Tat-P<sub>4</sub>-(C5)<sub>2</sub> or Biotin as negative control.

K. FP saturation binding of (20 nM) TMR-Tat-P<sub>4</sub>-(C5)<sub>2</sub>, to PICK1 WT or PICK1 A87L, showed a decrease in binding capacity of the PICK1 A87L mutant ( $K_d = 323$  nM) compared to PICK1 WT ( $K_d = 49$  nM).

Data information: HEK293 cells shown in A-C. were incubated with 20  $\mu$ M TMR-Tat-P<sub>4</sub>-(C5)<sub>2</sub> for 1 h prior to fixation with 4% PFA. Scale bars: 10  $\mu$ m, inserts 2  $\mu$ m.

Data points in K. are shown as mean with error-bars as SEM of  $n = 3$ . Data in K. was fitted to a log dose-response (three parameters) using GraphPad Prism 8.3.

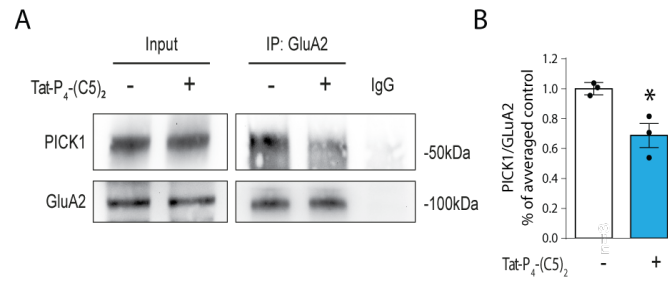

**Appendix Figure S9. Tat-P<sub>4</sub>-(C5)<sub>2</sub> reduces PICK1-GluA2 co-immunoprecipitation *ex vivo*.**

A. Representative immunoblots of co-immunoprecipitated PICK1:GluA2 (IP, left panels) from hippocampal slices.

B. Densitometry analysis of immunoblots show a partial disruption of PICK1:GluA2 interaction after 1 hour bath application of 20  $\mu$ M Tat-P<sub>4</sub>-(C5)<sub>2</sub> peptide.

Data information: For the pull-down procedure the primary antibody anti-GluA2 has been used instead of anti-PICK1 (**Figure 3C**) in order to validate the procedure. Unpaired t-test,  $t_{(4)}=4,444$ ,  $*P < 0.05$  n=3/group. All data are shown as mean with error-bars as SEM.

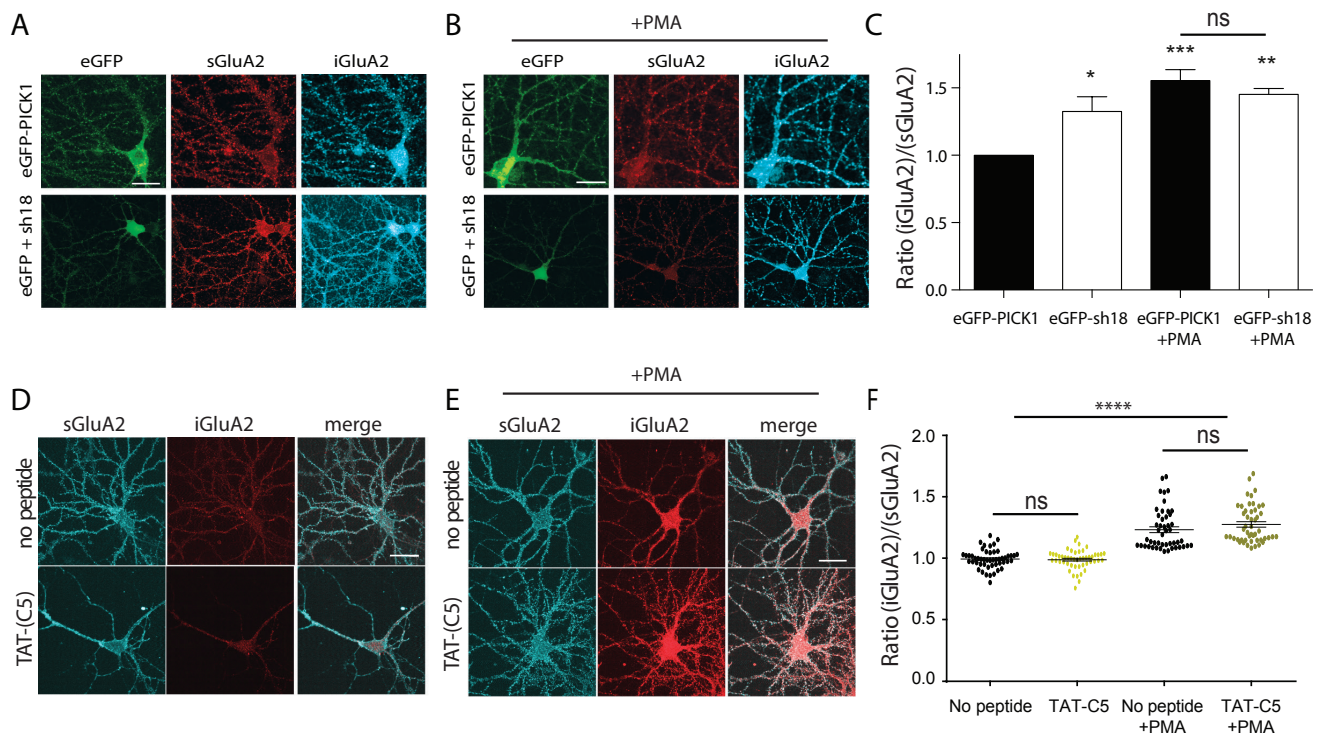

**Appendix Figure S10. Knock down of PICK1 increase GluA2 internalization, while Tat-C5 does not**

- A. Representative confocal images of hippocampal neurons transduced with eGFP-PICK1 (green, top) or GFP co-expressed with the short hairpin 18 silencing PICK1 expression (GFP-sh18, green, bottom), subjected to anti-GluA2 feeding. Under basal conditions knockdown of PICK1 (eGFP-sh18, bottom) induces an increase in internalized GluA2 (iGluA2, cyan) over surface GluA2 (sGluA2, red) ratio.
- B. Representative confocal images of hippocampal neurons transduced with eGFP-PICK1 (green, top) or GFP-sh18 (green, bottom), subjected to anti-GluA2 feeding, following PMA stimulation. In this case knockdown of PICK1 (eGFP-sh18, bottom) does not affect the internalized GluA2 (iGluA2, cyan) over surface GluA2 (sGluA2, red) ratio.

- C. Quantification of the internalized GluA2 measured as the ratio of internalized/surface labelled GluA2 within the region of interest outlining individual neurons on the basis of surface signal. Statistics were done using a One-way ANOVA with Tukey's post-test \*  $p \leq 0.05$ , \*\*  $p \leq 0.01$ , \*\*\*  $p \leq 0.001$  (n = 9-13 neurons/condition).
- D. Representative confocal images of un-transduced hippocampal neurons in absence (top) or presence (bottom) of Tat-C5. Subjected to anti-GluA2 feeding. Under basal conditions neither absence nor presence of Tat-C5 changes internalized GluA2 (iGluA2, cyan) over surface GluA2 (sGluA2, red) ratio. Ordinary two-way ANOVA, followed by Sidak post-test, revealed a significant effect between untreated control and PMA treatment ( $F_{(1,192)} = 217.6$  \*\*\*\* $p$ -value  $\leq 0.0001$ ), while the effect of Tat-C5 treatment was not significant  $F_{(1,192)} = 1.137$ ,  $p$ -value=0.2875) and it did not enter into any interaction (no peptide n=50, Tat-C5 n=49, PMA n=48, Tat-C5 + PMA n=49). All data expressed as mean  $\pm$  SEM.
- E. Representative confocal images of un-transduced PMA stimulated hippocampal neurons in absence (top) or presence (bottom) of Tat-C5. Subjected to anti-GluA2 feeding. Following PMA stimulation neither absence nor presence of Tat-C5 changes internalized GluA2 (iGluA2, cyan) over surface GluA2 (sGluA2, red) ratio.
- F. Quantification of the internalized GluA2 measured as the ratio of internalized/surface labelled GluA2 within the region of interest outlining individual neurons on the basis of surface signal.

Data information: In B. and E. neurons were stimulated for 10 min with PMA. In D. and E. 20  $\mu$ M Tat-C5 was added for 1 hr. Scale-bars represents 30  $\mu$ m.

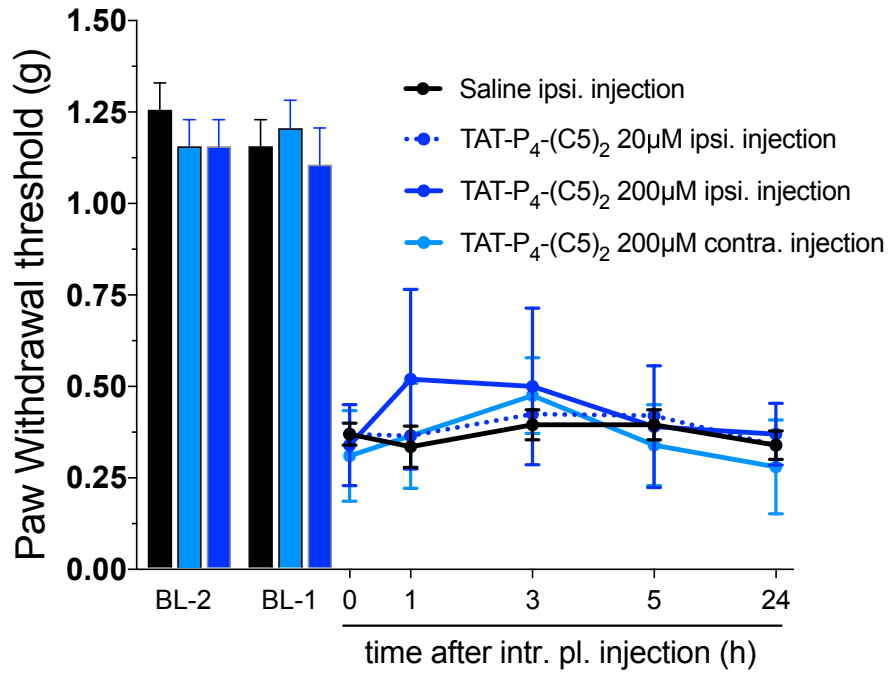

**Appendix Figure S11 Tat-P<sub>4</sub>-(C5)<sub>2</sub> does not alleviate allodynia after intraplantar administration**

Intraplantar administration of Tat-P<sub>4</sub>-(C5)<sub>2</sub> (7µl, 20 µM) or (7µl, 200µM) in the initiation phase of the SNI model did not change the paw withdrawal threshold significantly.

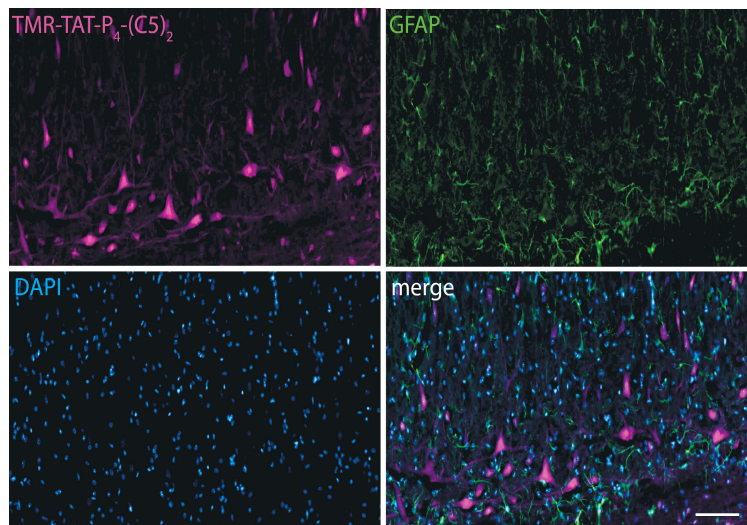



**Appendix Figure S12. TMR-Tat-P<sub>4</sub>-(C5)<sub>2</sub> does not label glia cells.**

Sagittal section of the spinal cord lumbar tract shows no overlap between immunostaining of the glial marker GFAP (green) and TMR-Tat-P<sub>4</sub>-(C5)<sub>2</sub> peptide (magenta) 1 hour after administration i.t (20 μM) in SNI mice. All cell nuclei were stained with DAPI (blue). Scale Bar: 100 μm.

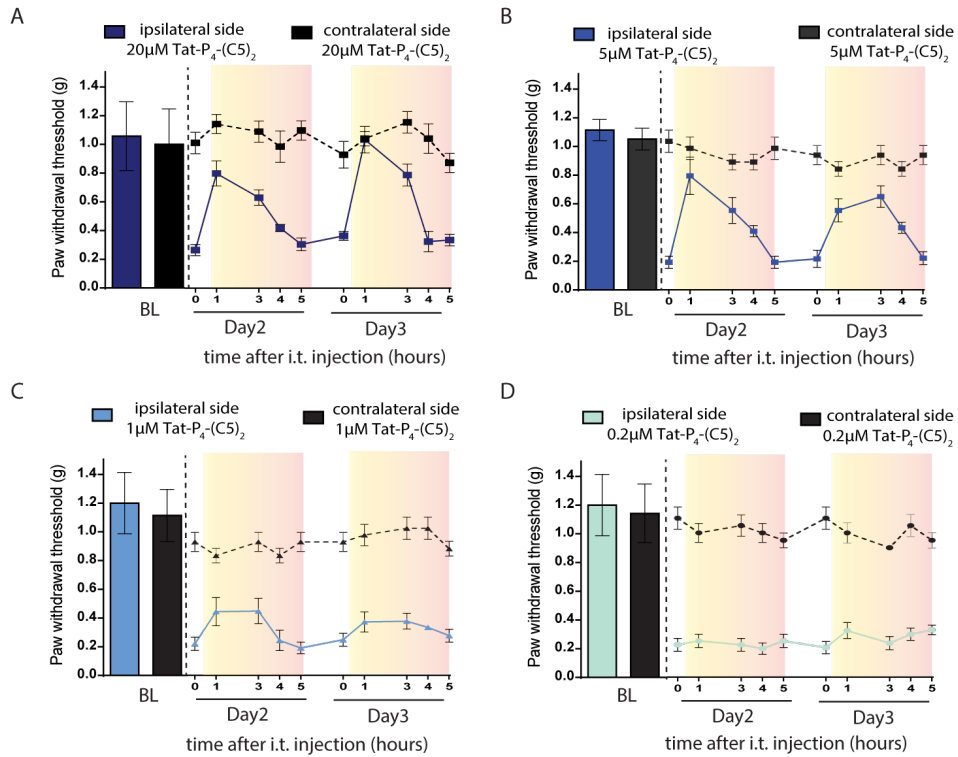

**Appendix Figure S13. I.t. administrations of Tat-P<sub>4</sub>-(C5)<sub>2</sub> dose-dependently attenuate mechanical hyperalgesia.**

A-D. Acute phase Von Frey test show dose-dependent reduction in SNI-induced hypersensitivity, at 1 and 3 h compared to 0 h, after i.t. administration, of Tat-P<sub>4</sub>-(C5)<sub>2</sub> both at Day 2 and 3 post-surgery. A. 20  $\mu\text{M}$  Tat-P<sub>4</sub>-(C5)<sub>2</sub>, n = 7 mice. B. 5  $\mu\text{M}$  Tat-P<sub>4</sub>-(C5)<sub>2</sub>, n = 8 mice. C. 1  $\mu\text{M}$  Tat-P<sub>4</sub>-(C5)<sub>2</sub>, n = 8 mice. D. 0.2  $\mu\text{M}$  Tat-P<sub>4</sub>-(C5)<sub>2</sub>, n = 8 mice.

Data information: All data points are shown as mean with error-bars as SEM.

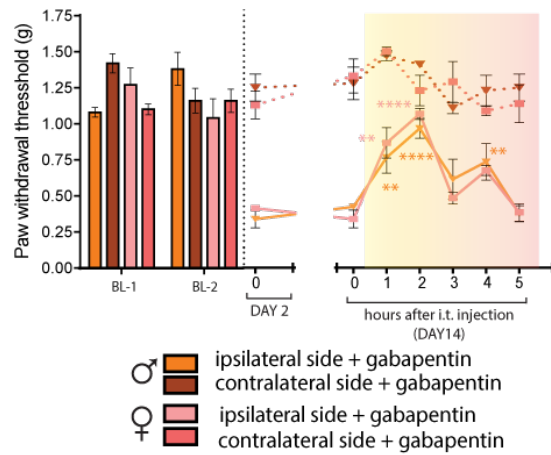

**Appendix Figure S14. Gabapentin i.p. administration in chronic phase SNI animals.**

Von Frey test in chronic phase (day 14 after surgery) shows full recovery from mechanical hypersensitivity at 2 h following i.p. administration of 30 mg/kg gabapentin in both genders SNI animals.

Data information: Both groups contain n = 4 pr. group pr. gender. All datapoints are expressed as mean with error-bars as SEM. Ipsi- and contralateral paw withdrawal thresholds at different time points were compared to time 0 using two-way repeated measures ANOVA followed by Dunnett’s multiple comparisons test (\*\* $P < 0.01$ , \*\*\*\* $P < 0.0001$ ).

## Appendix tables and legends

Appendix Table S1. N-terminal modification to increase affinity of DAT C3, C4 or C5 peptides

| Starting peptide                                                                    | 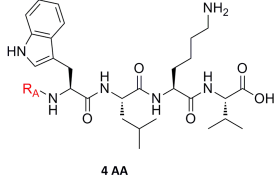 |  |  |
|-------------------------------------------------------------------------------------|-----------------------------------------------------------------------------------|------------------------------------------------------------------------------------|-------------------------------------------------------------------------------------|
|                                                                                     | $K_i$ ( $\mu\text{M}$ ) [SEM interval]                                            | $K_i$ ( $\mu\text{M}$ ) [SEM interval]                                             | $K_i$ ( $\mu\text{M}$ ) [SEM interval]                                              |
| <b>No modification</b>                                                              | 5.69 [5.35;6.05]                                                                  | 4.10 [3.78;4.44]                                                                   | 1.16 [0.93;1.46]                                                                    |
| <b>N-alkylation (R)</b>                                                             |                                                                                   |                                                                                    |                                                                                     |
| <b>CH<sub>3</sub></b>                                                               | 18.75 [17.55; 20.04]                                                              | 9.38 [8.73; 10.07]                                                                 | 2.52 [2.34; 2.70]                                                                   |
| <b>CH<sub>2</sub>CH<sub>3</sub></b>                                                 | 30.01 [28.09; 32.06]                                                              | N.D                                                                                | N.D.                                                                                |
| <b>(CH<sub>2</sub>)<sub>2</sub>CH<sub>3</sub></b>                                   | 46.64 [42.54; 51.15]                                                              | N.D                                                                                | N.D.                                                                                |
| <b>(CH<sub>2</sub>)<sub>3</sub>CH<sub>3</sub></b>                                   | 45.27 [41.78; 49.06]                                                              | N.D                                                                                | N.D.                                                                                |
|  | 15.06 [14.48;15.66]                                                               | 6.82 [6.67; 6.97]                                                                  | 2.87 [2.73; 3.03]                                                                   |
|  | 31.84 [25.08; 40.43]                                                              | N.D                                                                                | N.D.                                                                                |
|  | 24.52 [20.27; 29.66]                                                              | N.D                                                                                | N.D.                                                                                |
|  | 26.25 [21.92; 31.44]                                                              | N.D                                                                                | N.D.                                                                                |
|  | 38.55 [37.78; 39.34]                                                              | N.D                                                                                | N.D.                                                                                |
|  | 48.03 [38.33; 60.19]                                                              | N.D                                                                                | N.D.                                                                                |
| <b>N-acetylation (R)</b>                                                            |                                                                                   |                                                                                    |                                                                                     |
| <b>COCH<sub>3</sub></b>                                                             | 3.49 [3.35; 3.64]                                                                 | 3.80 [3.69; 3.92]                                                                  | 1.48 [1.40; 1.57]                                                                   |

**Appendix Table S2. Peptide affinities for purified PICK1 determined by FP. At 0.01% Triton-X 100 PICK1 is a dimer. At 0.1% Triton-X 100 PICK1 is a monomer.**

| Tracer identity *                                                                                             | Tested peptide                        | Triton-X 100 concentration | $K_D$ ** or $K_i$ *** | [SEM] interval      |
|---------------------------------------------------------------------------------------------------------------|---------------------------------------|----------------------------|-----------------------|---------------------|
| OrG-C11 (DAT)                                                                                                 | OrG-C11                               | 0.01 %                     | 0.44 $\mu$ M          | [0.35;0.54] $\mu$ M |
|                                                                                                               | C5                                    | 0.1 %                      | 9.10 $\mu$ M          | [6.0;13.8] $\mu$ M  |
|                                                                                                               |                                       | 0.01 %                     | 1.90 $\mu$ M          | [1.6;2.2] $\mu$ M   |
|                                                                                                               | Tat-C5                                | 0.1 %                      | 113 nM                | [106;120] nM        |
|                                                                                                               |                                       | 0.01 %                     | 106 nM                | [86.5;129] nM       |
|                                                                                                               | Tat-P <sub>4</sub> -(C5) <sub>2</sub> | 0.1 %                      | 30.2 nM               | [25.4;35.9] nM      |
| 0.01 %                                                                                                        |                                       | 39.3 nM                    | [36.0;43.0] nM        |                     |
| OrG-GluA2 C11                                                                                                 | Org-GluA2 C11                         | 0.01 %                     | 1.53 $\mu$ M          | [1.09;2.14] $\mu$ M |
|                                                                                                               | C5                                    | 0.01 %                     | 3.4 $\mu$ M           | [2.88;4.0] $\mu$ M  |
|                                                                                                               | Tat-C5                                | 0.01 %                     | 216.7 nM              | [206.4;227.6] nM    |
|                                                                                                               | Tat-P <sub>4</sub> -(C5) <sub>2</sub> | 0.01 %                     | 75.8 nM               | [71.4;80.4] nM      |
| 5FAM-Tat-C5                                                                                                   | 5FAM-Tat-C5                           | 0.01 %                     | 94.8 nM               | [80.5;111.8] nM     |
|                                                                                                               | C5                                    | 0.1 %                      | 471.8 nM              | [296.0;752.0] nM    |
|                                                                                                               |                                       | 0.01 %                     | 1.7 $\mu$ M           | [1.3;2.2] $\mu$ M   |
|                                                                                                               | Tat-C5                                | 0.1 %                      | 44.4 nM               | [33.3;59.2] nM      |
|                                                                                                               |                                       | 0.01 %                     | 18.3 nM               | [15.9;21.0] nM      |
|                                                                                                               | Tat-P <sub>4</sub> -(C5) <sub>2</sub> | 0.1 %                      | 28.9 nM               | [19.5;42.9] nM      |
| 0.01 %                                                                                                        |                                       | 6.2 nM                     | [5.53;7.0] nM         |                     |
| 5FAM-Tat-C5 (2 nM)                                                                                            | 5FAM-Tat-C5                           | 0.01 %                     | 19.5 nM               | [18.6;20.3] nM      |
|                                                                                                               | Tat-C5                                | 0.01 %                     | 13.30 nM              | [10.6;16.5] nM      |
|                                                                                                               | Tat-P <sub>4</sub> -(C5) <sub>2</sub> | 0.01 %                     | 1.7 nM                | [1.1;2.7] nM        |
| Notes:                                                                                                        |                                       |                            |                       |                     |
| * Tracer concentration is 20 nM unless stated otherwise                                                       |                                       |                            |                       |                     |
| ** $K_D$ is obtained from saturation curves fitted to a log dose response curve using GraphPad Prism 8.3      |                                       |                            |                       |                     |
| *** $K_i$ is obtained from competition curves fitted to a one-site competition curve using GraphPad Prism 8.3 |                                       |                            |                       |                     |

**Appendix Table S3. SAXS data table**

|                                                            |                                                           |       |       |       |       |       |                                                           |       |       |       |       |       |
|------------------------------------------------------------|-----------------------------------------------------------|-------|-------|-------|-------|-------|-----------------------------------------------------------|-------|-------|-------|-------|-------|
|                                                            | PICK1 Apo                                                 |       |       |       |       |       | PICK1, Tat-P <sub>4</sub> -(C5) <sub>2</sub>              |       |       |       |       |       |
| <b>Sample details</b>                                      |                                                           |       |       |       |       |       |                                                           |       |       |       |       |       |
| Uniprot ID                                                 | Q9EP80                                                    |       |       |       |       |       |                                                           |       |       |       |       |       |
| Organism                                                   | Rat                                                       |       |       |       |       |       |                                                           |       |       |       |       |       |
| Ligands                                                    | -                                                         |       |       |       |       |       | Tat-P <sub>4</sub> -(C5) <sub>2</sub>                     |       |       |       |       |       |
| Buffer                                                     | 50mM Tris, 125mM NaCl, 2mM DTT, 0.01% Triton-X100, pH 7.4 |       |       |       |       |       | 50mM Tris, 125mM NaCl, 2mM DTT, 0.01% Triton-X100, pH 7.4 |       |       |       |       |       |
| Extinction coefficient                                     | 32320* <sup>1</sup>                                       |       |       |       |       |       | 35443* <sup>2</sup>                                       |       |       |       |       |       |
| Molecular weight                                           | 46.6 kDa * <sup>1</sup>                                   |       |       |       |       |       | 47.5 kDa* <sup>2</sup>                                    |       |       |       |       |       |
| Protein concentration                                      | 0.5-3 mg/ml* <sup>3</sup>                                 |       |       |       |       |       | 0.5-2.45 mg/ml* <sup>3</sup>                              |       |       |       |       |       |
|                                                            | <b>SAXS data collection details</b>                       |       |       |       |       |       |                                                           |       |       |       |       |       |
| Instrument                                                 | P12, Petra III, DESY                                      |       |       |       |       |       |                                                           |       |       |       |       |       |
| Date for data collection                                   | 10-06-2015                                                |       |       |       |       |       |                                                           |       |       |       |       |       |
| Wavelength                                                 | 1.24                                                      |       |       |       |       |       |                                                           |       |       |       |       |       |
| Beam intensity                                             | 12.16                                                     |       |       |       |       |       |                                                           |       |       |       |       |       |
| Measured $q$ -range                                        | 0.0027-0.48                                               |       |       |       |       |       |                                                           |       |       |       |       |       |
| Absolute calibration                                       | water                                                     |       |       |       |       |       |                                                           |       |       |       |       |       |
| Exposure time                                              | 20 ms                                                     |       |       |       |       |       |                                                           |       |       |       |       |       |
| Temperature                                                | 283.35                                                    |       |       |       |       |       |                                                           |       |       |       |       |       |
|                                                            | <b>Software</b>                                           |       |       |       |       |       |                                                           |       |       |       |       |       |
| Indirect Fourier transformations to obtain $p(r)$          | Bayersapp.org                                             |       |       |       |       |       |                                                           |       |       |       |       |       |
| Fitting of data with combined analytical and atomic models | ATSAS, EOM, Ranch, Gajoe                                  |       |       |       |       |       |                                                           |       |       |       |       |       |
| Data rebin                                                 | WillItRebin* <sup>4</sup>                                 |       |       |       |       |       |                                                           |       |       |       |       |       |
|                                                            | <b>Structural parameters</b>                              |       |       |       |       |       |                                                           |       |       |       |       |       |
| <b>P(r) analysis</b>                                       | PICK1 WT                                                  |       |       |       |       |       | PICK1 + Tat-P <sub>4</sub> -(C5) <sub>2</sub>             |       |       |       |       |       |
| Sample concentration [mg/ml]                               | 0.5                                                       | 0.88  | 1.5   | 2.0   | 2.5   | 3.0   | 0.5                                                       | 0.75  | 1     | 1.5   | 2.0   | 2.45  |
| I0 estimate                                                | 0.15                                                      | 0.19  | 0.17  | 0.24  | 0.27  | 0.30  | 0.13                                                      | 0.13  | 0.13  | 0.13  | 0.14  | 0.14  |
| R <sub>g</sub> [Å]                                         | 114                                                       | 134   | 132   | 147   | 148   | 163   | 69                                                        | 77    | 69    | 75    | 75    | 80    |
| D <sub>max</sub> [Å]                                       | 368                                                       | 453   | 442   | 507   | 506   | 567   | 237                                                       | 307   | 235   | 309   | 289   | 308   |
| q-range                                                    | 0.0075-0.3918                                             |       |       |       |       |       |                                                           |       |       |       |       |       |
| Reduced $\chi^2$                                           | 0.86                                                      | 0.94  | 0.61  | 0.55  | 1.03  | 0.55  | 0.99                                                      | 0.66  | 0.87  | 0.73  | 0.85  | 0.69  |
| Number of good parameters                                  | 13.95                                                     | 21.85 | 33.36 | 29.07 | 31.72 | 39.28 | 9.11                                                      | 13.78 | 13.85 | 18.45 | 18.96 | 21.68 |
| Number of Shannon channels                                 | 44.95                                                     | 55.35 | 54.10 | 62.00 | 61.84 | 69.34 | 29.02                                                     | 37.54 | 28.84 | 37.78 | 35.35 | 21.68 |
| Number of                                                  | 103                                                       | 86    | 109   | 106   | 88    | 115   | 45                                                        | 97    | 103   | 94    | 87    | 96    |

|                                                |                                                                                                                                                                                                                                                                                                                                                                                                  |       |       |       |       |       |                                                                                |       |       |       |       |       |
|------------------------------------------------|--------------------------------------------------------------------------------------------------------------------------------------------------------------------------------------------------------------------------------------------------------------------------------------------------------------------------------------------------------------------------------------------------|-------|-------|-------|-------|-------|--------------------------------------------------------------------------------|-------|-------|-------|-------|-------|
| error calculations                             |                                                                                                                                                                                                                                                                                                                                                                                                  |       |       |       |       |       |                                                                                |       |       |       |       |       |
| Regularization parameter $\log(\alpha)$        | 13.97                                                                                                                                                                                                                                                                                                                                                                                            | 13.45 | 13.36 | 13.30 | 13.17 | 12.47 | 14.47                                                                          | 13.64 | 13.77 | 13.34 | 13.37 | 13.10 |
| <i>Mw</i> determination                        |                                                                                                                                                                                                                                                                                                                                                                                                  |       |       |       |       |       |                                                                                |       |       |       |       |       |
| Molecular weight (kDa)                         | 210                                                                                                                                                                                                                                                                                                                                                                                              | 262   | 233   | 336   | 373   | 420   | 183                                                                            | 186   | 177   | 184   | 197   | 219   |
| Expected ratio                                 | 4.4                                                                                                                                                                                                                                                                                                                                                                                              | 5.5   | 4.9   | 7.1   | 7.9   | 8.8   | 3.8                                                                            | 3.9   | 3.7   | 3.9   | 4.1   | 4.6   |
|                                                | <b>Model fitting parameters</b>                                                                                                                                                                                                                                                                                                                                                                  |       |       |       |       |       |                                                                                |       |       |       |       |       |
| <i>Combined analytical and atomistic model</i> |                                                                                                                                                                                                                                                                                                                                                                                                  |       |       |       |       |       |                                                                                |       |       |       |       |       |
| q-range                                        | Not fitted                                                                                                                                                                                                                                                                                                                                                                                       |       |       |       |       |       | 0.015-0.269                                                                    |       |       |       |       |       |
| Reduced $\chi^2$ (best fit)                    | Not fitted                                                                                                                                                                                                                                                                                                                                                                                       |       |       |       |       |       | 0.8                                                                            |       |       |       |       |       |
| <i>Ensemble optimization method (EOM)</i>      |                                                                                                                                                                                                                                                                                                                                                                                                  |       |       |       |       |       |                                                                                |       |       |       |       |       |
| Ranch pool generation                          |                                                                                                                                                                                                                                                                                                                                                                                                  |       |       |       |       |       | 10.000 / pool<br>15 Harmonics<br>0-10% Symmetric structures                    |       |       |       |       |       |
| Gajoe selection and fitting                    |                                                                                                                                                                                                                                                                                                                                                                                                  |       |       |       |       |       | 1000 generations<br>100 ensembles<br>max 20 curves ensemble<br>100 repetitions |       |       |       |       |       |
|                                                | <b>SASBDB IDs for data and models</b>                                                                                                                                                                                                                                                                                                                                                            |       |       |       |       |       |                                                                                |       |       |       |       |       |
| SASDB ID                                       | TBA                                                                                                                                                                                                                                                                                                                                                                                              |       |       |       |       |       | TBA                                                                            |       |       |       |       |       |
|                                                | <b>Footnotes and references</b>                                                                                                                                                                                                                                                                                                                                                                  |       |       |       |       |       |                                                                                |       |       |       |       |       |
|                                                | <p>*<sup>1</sup> Calculated using Expasy Protparam (<a href="https://web.expasy.org/protparam/">https://web.expasy.org/protparam/</a>)</p> <p>*<sup>2</sup> as *1 but assuming 1/2 peptide pr. PICK1 molecule</p> <p>*<sup>3</sup> Protein concentration was determined using UV280 absorption</p> <p>*<sup>4</sup> Binfactor 1.02, absolute scaling factor (water) for beamtime 0.00000234.</p> |       |       |       |       |       |                                                                                |       |       |       |       |       |
